# Supplementary material for: Adaptation to glucose starvation is associated with molecular reorganization of the circadian clock in Neurospora crassa
Source: eLife. 2023 Jan 10;12:e79765. doi: 10.7554/eLife.79765 (PMC9831608; doi:10.7554/eLife.79765)
Supplement: Figure 4—source data 2. — Significantly enriched functions are shown. Yellow highlight: wt-specific changes, red highlight: Δwc-1-specific changes. [file elife-79765-fig4-data2.xlsx]

## Sheet: Munka1
Figure 4 - Figure Supplement 5*
Gene Ontology (GO) enrichment analysis of genes showing at least two-fold significant alteration in their amount in response to starvation.
Significantly enriched functions are shown. Yellow highlight: wt-specific changes, red highlight: Δwc-1-specific changes.
	Genes showing significant enrichment among upregulated ones in wt
		Neurospora crassa (REF)	upload
	GO biological process complete	#	#	expected	Fold Enrichment	+/-	raw P value	FDR
	Unclassified	4789	806	620.83	1.30	+	6.90E-23	3.79E-20
	secondary metabolic process	38	17	4.93	3.45	+	8.96E-05	4.19E-03
	carbohydrate metabolic process	291	80	37.72	2.12	+	1.68E-08	1.17E-06
	cellular carbohydrate metabolic process	117	31	15.17	2.04	+	9.76E-04	3.18E-02
	polysaccharide metabolic process	90	26	11.67	2.23	+	6.47E-04	2.24E-02
	carbohydrate catabolic process	123	35	15.95	2.19	+	1.22E-04	5.23E-03
	polysaccharide catabolic process	63	21	8.17	2.57	+	4.37E-04	1.61E-02
	cell wall macromolecule catabolic process	17	10	2.20	4.54	+	5.12E-04	1.88E-02
	cell wall polysaccharide catabolic process	16	9	2.07	4.34	+	1.24E-03	3.82E-02
	xylan metabolic process	16	9	2.07	4.34	+	1.24E-03	3.85E-02
	xylan catabolic process	16	9	2.07	4.34	+	1.24E-03	3.88E-02
	carbohydrate transmembrane transport	31	22	4.02	5.47	+	2.37E-08	1.60E-06
	carbohydrate transport	42	24	5.44	4.41	+	1.15E-07	7.33E-06
	secondary metabolic process	38	17	4.93	3.45	+	8.96E-05	4.19E-03
	proton transmembrane transport	98	27	12.70	2.13	+	1.00E-03	3.22E-02
	Genes showing significant enrichment among upregulated ones in ∆wc-1
		Neurospora crassa (REF)	upload
	GO biological process complete	#	#	expected	Fold Enrichment	+/-	raw P value	FDR
	Unclassified	4789	851	702.30	1.21	+	2.01E-13	3.15E-11
	small molecule catabolic process	133	40	19.50	2.05	+	1.94E-04	7.49E-03
	secondary metabolic process	38	17	5.57	3.05	+	3.39E-04	1.20E-02
	carbohydrate metabolic process	291	91	42.67	2.13	+	1.80E-09	1.49E-07
	cellular carbohydrate metabolic process	117	34	17.16	1.98	+	8.13E-04	2.57E-02
	polysaccharide metabolic process							ns
	carbohydrate catabolic process	123	38	18.04	2.11	+	1.80E-04	7.02E-03
	polysaccharide catabolic process	63	22	9.24	2.38	+	9.11E-04	2.74E-02
	cell wall macromolecule catabolic process	17	10	2.49	4.01	+	1.22E-03	3.49E-02
	cell wall polysaccharide catabolic process	16	10	2.35	4.26	+	8.63E-04	2.67E-02
	hemicellulose metabolic process	17	10	2.49	4.01	+	1.22E-03	3.47E-02
	xylan metabolic process	16	10	2.35	4.26	+	8.63E-04	2.69E-02
	xylan catabolic process	16	10	2.35	4.26	+	8.63E-04	2.71E-02
	carbohydrate transmembrane transport	31	22	4.55	4.84	+	1.69E-07	1.13E-05
	carbohydrate transport	42	25	6.16	4.06	+	2.94E-07	1.90E-05
	transmembrane transport	522	116	76.55	1.52	+	6.76E-05	2.91E-03
	proton transmembrane transport							ns
	organic acid catabolic process	83	31	12.17	2.55	+	2.96E-05	1.48E-03
	carboxylic acid catabolic process	79	29	11.59	2.50	+	6.81E-05	2.90E-03
	cellular amino acid catabolic process	48	18	7.04	2.56	+	1.33E-03	3.76E-02
	Genes showing significant enrichment among downregulated ones in wt
		Neurospora crassa (REF)	upload
	GO biological process complete	#	#	expected	Fold Enrichment	+/-	raw P value	FDR
	metabolic process	3289	371	267.29	1.39	+	3.10E-13	8.00E-11
	cellular metabolic process	2914	328	236.81	1.39	+	4.40E-11	8.79E-09
	primary metabolic process	2769	275	225.03	1.22	+	2.06E-04	6.37E-03
	organic substance metabolic process	2992	326	243.15	1.34	+	2.74E-09	4.30E-07
	nitrogen cycle metabolic process	9	7	.73	9.57	+	8.26E-05	3.27E-03
	nitrogen compound metabolic process	2447	263	198.86	1.32	+	1.10E-06	8.18E-05
	organonitrogen compound metabolic process	1620	233	131.65	1.77	+	1.36E-17	4.28E-15
	cellular biogenic amine metabolic process	23	10	1.87	5.35	+	1.02E-04	3.71E-03
	amine metabolic process	28	12	2.28	5.27	+	2.34E-05	1.08E-03
	cellular amine metabolic process	24	10	1.95	5.13	+	1.35E-04	4.60E-03
	indole-containing compound metabolic process	14	8	1.14	7.03	+	1.21E-04	4.27E-03
	indolalkylamine metabolic process	14	8	1.14	7.03	+	1.21E-04	4.24E-03
	pyridine-containing compound metabolic process	27	9	2.19	4.10	+	1.08E-03	2.36E-02
	pteridine-containing compound metabolic process	16	7	1.30	5.38	+	1.11E-03	2.39E-02
	organophosphate metabolic process	316	55	25.68	2.14	+	9.72E-07	7.37E-05
	phosphate-containing compound metabolic process	582	85	47.30	1.80	+	9.55E-07	7.36E-05
	phosphorus metabolic process	598	87	48.60	1.79	+	8.72E-07	6.97E-05
	sulfur compound metabolic process	123	39	10.00	3.90	+	3.94E-11	8.23E-09
	small molecule metabolic process	696	201	56.56	3.55	+	1.79E-50	7.85E-47
	one-carbon metabolic process	17	11	1.38	7.96	+	2.64E-06	1.66E-04
	biosynthetic process	1261	202	102.48	1.97	+	1.25E-19	4.23E-17
	cellular biosynthetic process	1212	189	98.50	1.92	+	4.82E-17	1.41E-14
	organic substance biosynthetic process	1183	181	96.14	1.88	+	1.52E-15	4.17E-13
	cellular lipid biosynthetic process	24	8	1.95	4.10	+	2.04E-03	3.93E-02
	heterocycle biosynthetic process	416	59	33.81	1.75	+	1.13E-04	4.01E-03
	organic cyclic compound biosynthetic process	463	77	37.63	2.05	+	3.18E-08	3.78E-06
	cellular nitrogen compound biosynthetic process	691	88	56.16	1.57	+	9.41E-05	3.56E-03
	organonitrogen compound biosynthetic process	689	144	55.99	2.57	+	8.33E-23	3.05E-20
	cellular biogenic amine biosynthetic process	12	6	.98	6.15	+	1.50E-03	3.03E-02
	amine biosynthetic process	12	6	.98	6.15	+	1.50E-03	3.02E-02
	aromatic compound biosynthetic process	408	62	33.16	1.87	+	1.39E-05	6.94E-04
	pyridine-containing compound biosynthetic process	23	9	1.87	4.82	+	4.24E-04	1.15E-02
	small molecule biosynthetic process	293	111	23.81	4.66	+	1.40E-35	1.02E-32
	organophosphate biosynthetic process	213	35	17.31	2.02	+	3.28E-04	9.23E-03
	sulfur compound biosynthetic process	54	23	4.39	5.24	+	5.04E-09	7.14E-07
	small molecule catabolic process	133	25	10.81	2.31	+	3.48E-04	9.60E-03
	organic acid metabolic process	380	148	30.88	4.79	+	4.64E-49	1.02E-45
	oxoacid metabolic process	369	145	29.99	4.84	+	2.14E-48	3.14E-45
	carboxylic acid metabolic process	358	139	29.09	4.78	+	8.04E-46	8.83E-43
	monocarboxylic acid metabolic process	134	29	10.89	2.66	+	1.31E-05	6.71E-04
	dicarboxylic acid metabolic process	43	17	3.49	4.86	+	1.17E-06	8.57E-05
	organic acid biosynthetic process	156	81	12.68	6.39	+	2.21E-33	1.22E-30
	dicarboxylic acid biosynthetic process	18	8	1.46	5.47	+	4.53E-04	1.20E-02
	carboxylic acid biosynthetic process	151	80	12.27	6.52	+	1.93E-33	1.21E-30
	organic acid catabolic process	83	17	6.75	2.52	+	1.56E-03	3.12E-02
	carboxylic acid catabolic process	79	16	6.42	2.49	+	2.36E-03	4.47E-02
	organic acid transport	64	16	5.20	3.08	+	2.51E-04	7.40E-03
	organic acid transmembrane transport	52	13	4.23	3.08	+	9.34E-04	2.10E-02
	carboxylic acid transmembrane transport	52	13	4.23	3.08	+	9.34E-04	2.09E-02
	cellular amino acid metabolic process	209	109	16.98	6.42	+	4.44E-45	3.90E-42
	cellular modified amino acid metabolic process	57	17	4.63	3.67	+	2.55E-05	1.17E-03
	alpha-amino acid metabolic process	134	72	10.89	6.61	+	1.91E-30	8.40E-28
	branched-chain amino acid metabolic process	21	12	1.71	7.03	+	2.42E-06	1.61E-04
	serine family amino acid metabolic process	32	17	2.60	6.54	+	4.32E-08	4.87E-06
	sulfur amino acid metabolic process	37	17	3.01	5.65	+	2.19E-07	2.09E-05
	glutamine family amino acid metabolic process	41	25	3.33	7.50	+	2.97E-12	6.52E-10
	glycine metabolic process	9	5	.73	6.84	+	2.67E-03	4.93E-02
	methionine metabolic process	20	11	1.63	6.77	+	8.44E-06	4.64E-04
	tryptophan metabolic process	14	8	1.14	7.03	+	1.21E-04	4.20E-03
	threonine metabolic process	7	6	.57	10.55	+	1.92E-04	5.97E-03
	homoserine metabolic process	13	8	1.06	7.57	+	8.27E-05	3.22E-03
	aromatic amino acid family metabolic process	30	15	2.44	6.15	+	4.92E-07	4.24E-05
	lysine metabolic process	11	8	.89	8.95	+	3.52E-05	1.53E-03
	arginine metabolic process	14	10	1.14	8.79	+	4.04E-06	2.50E-04
	aspartate family amino acid metabolic process	40	25	3.25	7.69	+	1.98E-12	4.58E-10
	glutamine metabolic process	19	13	1.54	8.42	+	2.01E-07	1.96E-05
	leucine metabolic process	8	5	.65	7.69	+	1.83E-03	3.57E-02
	cellular amino acid biosynthetic process	100	66	8.13	8.12	+	7.22E-32	3.52E-29
	aromatic amino acid family biosynthetic process	16	11	1.30	8.46	+	1.72E-06	1.20E-04
	sulfur amino acid biosynthetic process	27	12	2.19	5.47	+	1.75E-05	8.37E-04
	alpha-amino acid biosynthetic process	81	50	6.58	7.60	+	2.04E-23	8.16E-21
	aspartate family amino acid biosynthetic process	33	20	2.68	7.46	+	4.92E-10	9.00E-08
	serine family amino acid biosynthetic process	19	9	1.54	5.83	+	1.37E-04	4.63E-03
	glutamine family amino acid biosynthetic process	18	15	1.46	10.25	+	3.49E-09	5.28E-07
	lysine biosynthetic process	10	8	.81	9.84	+	2.18E-05	1.02E-03
	lysine biosynthetic process via aminoadipic acid	7	5	.57	8.79	+	1.20E-03	2.52E-02
	branched-chain amino acid biosynthetic process	13	10	1.06	9.47	+	2.52E-06	1.65E-04
	methionine biosynthetic process	19	10	1.54	6.48	+	2.92E-05	1.31E-03
	leucine biosynthetic process	5	5	.41	12.31	+	4.34E-04	1.17E-02
	threonine biosynthetic process	4	4	.33	12.31	+	1.73E-03	3.45E-02
	arginine biosynthetic process	9	8	.73	10.94	+	1.30E-05	6.70E-04
	cellular amino acid catabolic process	48	14	3.90	3.59	+	1.59E-04	5.25E-03
	alpha-amino acid catabolic process	36	12	2.93	4.10	+	1.66E-04	5.34E-03
	amino acid activation	42	19	3.41	5.57	+	5.15E-08	5.66E-06
	tRNA aminoacylation for protein translation	36	19	2.93	6.49	+	7.50E-09	1.03E-06
	tRNA metabolic process	138	26	11.21	2.32	+	2.51E-04	7.36E-03
	tRNA aminoacylation	40	19	3.25	5.84	+	2.80E-08	3.52E-06
	aminoacyl-tRNA metabolism involved in translational fidelity	9	5	.73	6.84	+	2.67E-03	4.95E-02
	nucleotide metabolic process	151	38	12.27	3.10	+	1.62E-08	2.15E-06
	ribonucleotide metabolic process	105	28	8.53	3.28	+	4.70E-07	4.22E-05
	ribose phosphate metabolic process	113	28	9.18	3.05	+	1.63E-06	1.15E-04
	ribonucleoside diphosphate metabolic process	24	9	1.95	4.61	+	5.44E-04	1.37E-02
	ribonucleoside monophosphate metabolic process	30	11	2.44	4.51	+	1.57E-04	5.23E-03
	nucleoside phosphate metabolic process	156	38	12.68	3.00	+	3.39E-08	3.91E-06
	purine ribonucleoside monophosphate metabolic process	21	11	1.71	6.45	+	1.20E-05	6.35E-04
	purine nucleoside monophosphate metabolic process	21	11	1.71	6.45	+	1.20E-05	6.27E-04
	purine ribonucleoside diphosphate metabolic process	21	9	1.71	5.27	+	2.48E-04	7.40E-03
	nucleobase-containing small molecule metabolic process	208	46	16.90	2.72	+	1.79E-08	2.31E-06
	purine nucleoside diphosphate metabolic process	21	9	1.71	5.27	+	2.48E-04	7.35E-03
	nucleoside diphosphate metabolic process	27	9	2.19	4.10	+	1.08E-03	2.34E-02
	purine ribonucleotide metabolic process	92	26	7.48	3.48	+	4.75E-07	4.17E-05
	purine nucleotide metabolic process	97	27	7.88	3.43	+	3.69E-07	3.45E-05
	purine-containing compound metabolic process	115	32	9.35	3.42	+	3.11E-08	3.80E-06
	nucleoside monophosphate metabolic process	36	11	2.93	3.76	+	5.72E-04	1.44E-02
	ribonucleoside monophosphate biosynthetic process	26	11	2.11	5.21	+	5.61E-05	2.28E-03
	nucleoside monophosphate biosynthetic process	29	11	2.36	4.67	+	1.23E-04	4.23E-03
	purine ribonucleoside monophosphate biosynthetic process	17	11	1.38	7.96	+	2.64E-06	1.71E-04
	purine nucleoside monophosphate biosynthetic process	17	11	1.38	7.96	+	2.64E-06	1.68E-04
	purine-containing compound biosynthetic process	69	18	5.61	3.21	+	6.61E-05	2.67E-03
	purine ribonucleotide biosynthetic process	58	15	4.71	3.18	+	2.85E-04	8.30E-03
	ribonucleotide biosynthetic process	68	17	5.53	3.08	+	1.62E-04	5.29E-03
	purine nucleotide biosynthetic process	62	15	5.04	2.98	+	5.22E-04	1.33E-02
	nucleotide biosynthetic process	100	22	8.13	2.71	+	9.72E-05	3.65E-03
	nucleoside phosphate biosynthetic process	100	22	8.13	2.71	+	9.72E-05	3.62E-03
	nucleotide phosphorylation	21	9	1.71	5.27	+	2.48E-04	7.45E-03
	nucleoside diphosphate phosphorylation	20	9	1.63	5.54	+	1.86E-04	5.82E-03
	tetrahydrofolate metabolic process	11	6	.89	6.71	+	1.06E-03	2.35E-02
	folic acid-containing compound metabolic process	15	7	1.22	5.74	+	8.26E-04	1.90E-02
	tetrahydrofolate interconversion	6	5	.49	10.25	+	7.46E-04	1.78E-02
	carbohydrate derivative metabolic process	320	44	26.01	1.69	+	1.59E-03	3.17E-02
	pectin metabolic process	7	5	.57	8.79	+	1.20E-03	2.50E-02
	galacturonan metabolic process	7	5	.57	8.79	+	1.20E-03	2.55E-02
	monosaccharide metabolic process	42	13	3.41	3.81	+	1.66E-04	5.36E-03
	hexose metabolic process	30	10	2.44	4.10	+	5.78E-04	1.44E-02
	glucose metabolic process	20	10	1.63	6.15	+	4.08E-05	1.72E-03
	pyruvate metabolic process	27	12	2.19	5.47	+	1.75E-05	8.46E-04
	ribose phosphate biosynthetic process	73	17	5.93	2.87	+	3.33E-04	9.27E-03
	carbohydrate catabolic process	123	25	10.00	2.50	+	1.10E-04	3.93E-03
	glucose catabolic process	4	4	.33	12.31	+	1.73E-03	3.43E-02
	pectin catabolic process	7	5	.57	8.79	+	1.20E-03	2.51E-02
	glycolytic process	18	9	1.46	6.15	+	9.96E-05	3.64E-03
	'de novo' IMP biosynthetic process	9	7	.73	9.57	+	8.26E-05	3.24E-03
	IMP metabolic process	12	9	.98	9.23	+	9.42E-06	5.11E-04
	IMP biosynthetic process	11	8	.89	8.95	+	3.52E-05	1.55E-03
	ADP metabolic process	20	9	1.63	5.54	+	1.86E-04	5.86E-03
	ATP generation from ADP	18	9	1.46	6.15	+	9.96E-05	3.68E-03
	organic hydroxy compound metabolic process	111	20	9.02	2.22	+	2.18E-03	4.14E-02
	secondary alcohol metabolic process	31	9	2.52	3.57	+	2.40E-03	4.52E-02
	organic hydroxy compound biosynthetic process	61	15	4.96	3.03	+	4.51E-04	1.20E-02
	cellular alcohol biosynthetic process	24	8	1.95	4.10	+	2.04E-03	3.89E-02
	secondary alcohol biosynthetic process	25	8	2.03	3.94	+	2.52E-03	4.68E-02
	sterol metabolic process	39	12	3.17	3.79	+	3.08E-04	8.78E-03
	steroid metabolic process	42	12	3.41	3.52	+	5.40E-04	1.37E-02
	phytosteroid biosynthetic process	24	8	1.95	4.10	+	2.04E-03	3.95E-02
	sterol biosynthetic process	33	10	2.68	3.73	+	1.06E-03	2.34E-02
	steroid biosynthetic process	33	10	2.68	3.73	+	1.06E-03	2.33E-02
	ergosterol biosynthetic process	24	8	1.95	4.10	+	2.04E-03	3.91E-02
	vitamin metabolic process	29	10	2.36	4.24	+	4.65E-04	1.21E-02
	water-soluble vitamin metabolic process	29	10	2.36	4.24	+	4.65E-04	1.22E-02
	vitamin biosynthetic process	25	8	2.03	3.94	+	2.52E-03	4.72E-02
	water-soluble vitamin biosynthetic process	25	8	2.03	3.94	+	2.52E-03	4.70E-02
	pigment metabolic process	27	10	2.19	4.56	+	2.92E-04	8.44E-03
	pigment biosynthetic process	25	10	2.03	4.92	+	1.77E-04	5.62E-03
	antibiotic metabolic process	41	11	3.33	3.30	+	1.40E-03	2.88E-02
	drug metabolic process	41	11	3.33	3.30	+	1.40E-03	2.87E-02
	antibiotic biosynthetic process	41	11	3.33	3.30	+	1.40E-03	2.86E-02
	transition metal ion homeostasis	45	12	3.66	3.28	+	9.04E-04	2.06E-02
	cellular transition metal ion homeostasis	44	12	3.58	3.36	+	7.65E-04	1.81E-02
	reactive nitrogen species metabolic process	7	5	.57	8.79	+	1.20E-03	2.53E-02
	Genes showing significant enrichment among downregulated ones in ∆wc-1
		Neurospora crassa (REF)	upload
	GO biological process complete	#	#	expected	Fold Enrichment	+/-	raw P value	FDR
	metabolic process	3289	363	266.27	1.36	+	8.45e-12	2.06e-09
	cellular metabolic process	2914	319	235.92	1.35	+	1.58e-09	2.67e-07
	primary metabolic process	2769	284	224.18	1.27	+	1.02e-05	0.000647
	organic substance metabolic process	2992	324	242.23	1.34	+	4.17e-09	6.32e-07
	nitrogen cycle metabolic process							ns
	nitrogen compound metabolic process	2447	254	198.11	1.28	+	1.81e-05	0.00103
	organonitrogen compound metabolic process	1620	218	131.15	1.66	+	1.6e-13	4.4e-11
	cellular biogenic amine metabolic process	23	9	1.86	4.83	+	0.000413	0.0122
	amine metabolic process	28	10	2.27	4.41	+	0.00036	0.011
	cellular amine metabolic process	24	9	1.94	4.63	+	0.00053	0.0146
	organic cyclic compound metabolic process	1278	140	103.47	1.35	+	0.000411	0.0124
	indole-containing compound metabolic process	14	8	1.13	7.06	+	0.000119	0.00491
	indolalkylamine metabolic process	14	8	1.13	7.06	+	0.000119	0.00487
	pyridine-containing compound metabolic process	27	9	2.19	4.12	+	0.00106	0.0261
	pteridine-containing compound metabolic process							ns
	organophosphate metabolic process	316	59	25.58	2.31	+	3.6e-08	3.95e-06
	phosphate-containing compound metabolic process	582	87	47.12	1.85	+	2.73e-07	2.66e-05
	phosphorus metabolic process	598	92	48.41	1.9	+	3.24e-08	3.85e-06
	sulfur compound metabolic process	123	37	9.96	3.72	+	3.9e-10	8.15e-08
	small molecule metabolic process	696	190	56.35	3.37	+	1.17e-44	5.15e-41
	one-carbon metabolic process	17	8	1.38	5.81	+	0.000328	0.0103
	biosynthetic process	1261	195	102.09	1.91	+	1.42e-17	5.2e-15
	cellular biosynthetic process	1212	187	98.12	1.91	+	1.11e-16	3.76e-14
	organic substance biosynthetic process	1183	179	95.77	1.87	+	3.46e-15	1.01e-12
	cellular lipid biosynthetic process	24	8	1.94	4.12	+	0.00199	0.0429
	heterocycle biosynthetic process	416	64	33.68	1.9	+	4.74e-06	0.000336
	organic cyclic compound biosynthetic process	463	80	37.48	2.13	+	2.64e-09	4.3e-07
	cellular nitrogen compound biosynthetic process	691	90	55.94	1.61	+	2.77e-05	0.00147
	organonitrogen compound biosynthetic process	689	135	55.78	2.42	+	2.57e-19	1.13e-16
	cellular biogenic amine biosynthetic process							ns
	amine biosynthetic process							ns
	aromatic compound biosynthetic process	408	65	33.03	1.97	+	1.56e-06	0.00012
	pyridine-containing compound biosynthetic process	23	9	1.86	4.83	+	0.000413	0.0123
	small molecule biosynthetic process	293	101	23.72	4.26	+	9.5e-30	6.96e-27
	organophosphate biosynthetic process	213	43	17.24	2.49	+	4.26e-07	3.98e-05
	sulfur compound biosynthetic process	54	25	4.37	5.72	+	2.55e-10	5.61e-08
	small molecule catabolic process							ns
	organic acid metabolic process	380	127	30.76	4.13	+	2.12e-36	4.66e-33
	oxoacid metabolic process	369	124	29.87	4.15	+	1.03e-35	1.51e-32
	carboxylic acid metabolic process	358	119	28.98	4.11	+	7.19e-34	7.89e-31
	monocarboxylic acid metabolic process	134	32	10.85	2.95	+	5.53e-07	4.96e-05
	dicarboxylic acid metabolic process	43	14	3.48	4.02	+	5.75e-05	0.00266
	organic acid biosynthetic process	156	69	12.63	5.46	+	2.05e-25	1.29e-22
	dicarboxylic acid biosynthetic process	18	8	1.46	5.49	+	0.000442	0.0128
	carboxylic acid biosynthetic process	151	68	12.22	5.56	+	2.06e-25	1.13e-22
	organic acid catabolic process							ns
	carboxylic acid catabolic process							ns
	monocarboxylic acid biosynthetic process	40	13	3.24	4.01	+	0.000107	0.00447
								ns
	organic acid transport							ns
	organic acid transmembrane transport							ns
	carboxylic acid transmembrane transport							ns
	cellular amino acid metabolic process	209	88	16.92	5.2	+	5.27e-31	4.63e-28
	cellular modified amino acid metabolic process							ns
	alpha-amino acid metabolic process	134	55	10.85	5.07	+	2.87e-19	1.14e-16
	branched-chain amino acid metabolic process	21	9	1.7	5.29	+	0.000241	0.00785
	serine family amino acid metabolic process							ns
	sulfur amino acid metabolic process	37	14	3	4.67	+	1.47e-05	0.000864
	glutamine family amino acid metabolic process	41	20	3.32	6.03	+	8.01e-09	1.07e-06
	glycine metabolic process							ns
	methionine metabolic process	20	10	1.62	6.18	+	3.96e-05	0.00193
	tryptophan metabolic process	14	8	1.13	7.06	+	0.000119	0.00482
	threonine metabolic process	7	5	0.57	8.82	+	0.00118	0.0277
	homoserine metabolic process	13	6	1.05	5.7	+	0.00201	0.0425
	aromatic amino acid family metabolic process	30	14	2.43	5.76	+	2.15e-06	0.00016
	lysine metabolic process	11	7	0.89	7.86	+	0.000197	0.00697
	arginine metabolic process	14	9	1.13	7.94	+	2.22e-05	0.00123
	aspartate family amino acid metabolic process	40	22	3.24	6.79	+	2.51e-10	5.8e-08
	glutamine metabolic process	19	8	1.54	5.2	+	0.000588	0.0158
	leucine metabolic process							ns
	cellular amino acid biosynthetic process	100	52	8.1	6.42	+	8.08e-22	3.95e-19
	aromatic amino acid family biosynthetic process	16	10	1.3	7.72	+	9.22e-06	0.000596
	sulfur amino acid biosynthetic process	27	10	2.19	4.57	+	0.000284	0.00903
	alpha-amino acid biosynthetic process	81	39	6.56	5.95	+	8.47e-16	2.66e-13
	aspartate family amino acid biosynthetic process	33	18	2.67	6.74	+	1.2e-08	1.55e-06
	serine family amino acid biosynthetic process							ns
	glutamine family amino acid biosynthetic process	18	12	1.46	8.23	+	7.03e-07	6.17e-05
	lysine biosynthetic process	10	7	0.81	8.65	+	0.000129	0.00509
	lysine biosynthetic process via aminoadipic acid							ns
	branched-chain amino acid biosynthetic process	13	8	1.05	7.6	+	8.07e-05	0.00358
	methionine biosynthetic process	19	9	1.54	5.85	+	0.000133	0.00519
	leucine biosynthetic process							ns
	threonine biosynthetic process	4	4	0.32	12.35	+	0.00171	0.038
	arginine biosynthetic process	9	8	0.73	10.98	+	1.26e-05	0.000781
	cellular amino acid catabolic process							ns
	alpha-amino acid catabolic process							ns
	amino acid activation	42	19	3.4	5.59	+	4.87e-08	5.22e-06
	tRNA aminoacylation for protein translation	36	19	2.91	6.52	+	7.08e-09	9.72e-07
	tRNA metabolic process	138	27	11.17	2.42	+	0.000124	0.00501
	tRNA aminoacylation	40	19	3.24	5.87	+	2.65e-08	3.23e-06
	aminoacyl-tRNA metabolism involved in translational fidelity							ns
	nucleotide metabolic process	151	41	12.22	3.35	+	5.92e-10	1.13e-07
	ribonucleotide metabolic process	105	32	8.5	3.76	+	4.64e-09	6.8e-07
	ribose phosphate metabolic process	113	33	9.15	3.61	+	6.45e-09	9.14e-07
	ribonucleoside diphosphate metabolic process	24	9	1.94	4.63	+	0.00053	0.0147
	ribonucleoside monophosphate metabolic process	30	10	2.43	4.12	+	0.000562	0.0153
	nucleoside phosphate metabolic process	156	42	12.63	3.33	+	4.53e-10	9.05e-08
	purine ribonucleoside monophosphate metabolic process	21	9	1.7	5.29	+	0.000241	0.00803
	purine nucleoside monophosphate metabolic process	21	9	1.7	5.29	+	0.000241	0.00791
	purine ribonucleoside diphosphate metabolic process	21	9	1.7	5.29	+	0.000241	0.00809
	nucleobase-containing small molecule metabolic process	208	54	16.84	3.21	+	4.55e-12	1.18e-09
	purine nucleoside diphosphate metabolic process	21	9	1.7	5.29	+	0.000241	0.00796
	nucleoside diphosphate metabolic process	27	9	2.19	4.12	+	0.00106	0.0259
	purine ribonucleotide metabolic process	92	29	7.45	3.89	+	1.32e-08	1.66e-06
	purine nucleotide metabolic process	97	29	7.85	3.69	+	3.49e-08	3.93e-06
	purine-containing compound metabolic process	115	35	9.31	3.76	+	9.02e-10	1.65e-07
	nucleoside monophosphate metabolic process	36	10	2.91	3.43	+	0.0018	0.0391
	nucleobase metabolic process	28	10	2.27	4.41	+	0.00036	0.011
	ribonucleoside monophosphate biosynthetic process	26	10	2.1	4.75	+	0.000222	0.00773
	nucleoside monophosphate biosynthetic process	29	10	2.35	4.26	+	0.000452	0.0129
	purine ribonucleoside monophosphate biosynthetic process	17	9	1.38	6.54	+	6.91e-05	0.00316
	purine nucleoside monophosphate biosynthetic process	17	9	1.38	6.54	+	6.91e-05	0.00313
	purine-containing compound biosynthetic process	69	21	5.59	3.76	+	2.12e-06	0.000161
	purine ribonucleotide biosynthetic process	58	19	4.7	4.05	+	2.65e-06	0.000191
	ribonucleotide biosynthetic process	68	22	5.51	4	+	5.19e-07	4.75e-05
	purine nucleotide biosynthetic process	62	19	5.02	3.79	+	5.94e-06	0.000407
	nucleotide biosynthetic process	100	28	8.1	3.46	+	1.89e-07	1.93e-05
	nucleoside phosphate biosynthetic process	100	28	8.1	3.46	+	1.89e-07	1.88e-05
	nucleoside bisphosphate biosynthetic process	17	10	1.38	7.27	+	1.37e-05	0.000834
	purine nucleoside bisphosphate biosynthetic process	17	10	1.38	7.27	+	1.37e-05	0.000834
	ribonucleoside bisphosphate biosynthetic process	17	10	1.38	7.27	+	1.37e-05	0.000834
	ribonucleoside bisphosphate metabolic process	30	12	2.43	4.94	+	3.88e-05	0.00196
	nucleoside bisphosphate metabolic process	30	12	2.43	4.94	+	3.88e-05	0.00196
	purine nucleoside bisphosphate metabolic process	30	12	2.43	4.94	+	3.88e-05	0.00196
	nucleotide phosphorylation	21	9	1.7	5.29	+	0.000241	0.00815
	nucleoside diphosphate phosphorylation	20	9	1.62	5.56	+	0.000181	0.00651
	tetrahydrofolate metabolic process							ns
	folic acid-containing compound metabolic process							ns
	tetrahydrofolate interconversion							ns
	carbohydrate derivative metabolic process	320	50	25.91	1.93	+	4.6e-05	0.00217
	pectin metabolic process	7	5	0.57	8.82	+	0.00118	0.0279
	galacturonan metabolic process	7	5	0.57	8.82	+	0.00118	0.0282
	monosaccharide metabolic process	42	12	3.4	3.53	+	0.000523	0.0145
	hexose metabolic process	30	10	2.43	4.12	+	0.000562	0.0153
	glucose metabolic process	20	8	1.62	4.94	+	0.00077	0.02
	pyruvate metabolic process	27	14	2.19	6.4	+	8.14e-07	6.75e-05
	carbohydrate metabolic process	291	47	23.56	1.99	+	3.29e-05	0.0017
	polysaccharide metabolic process	90	20	7.29	2.74	+	0.000169	0.00629
	carbohydrate derivative biosynthetic process	213	34	17.24	1.97	+	0.000519	0.0145
	ribose phosphate biosynthetic process	73	22	5.91	3.72	+	1.4e-06	0.00011
	carbohydrate catabolic process	123	29	9.96	2.91	+	2.33e-06	0.00017
	polysaccharide catabolic process	63	16	5.1	3.14	+	0.000207	0.00728
	glucose catabolic process	4	4	0.32	12.35	+	0.00171	0.0376
	pectin catabolic process	7	5	0.57	8.82	+	0.00118	0.028
	glycolytic process	18	9	1.46	6.18	+	9.69e-05	0.00413
	'de novo' IMP biosynthetic process	9	7	0.73	9.61	+	8.08e-05	0.00355
	IMP metabolic process	12	9	0.97	9.26	+	9.15e-06	0.0006
	IMP biosynthetic process	11	8	0.89	8.98	+	3.43e-05	0.00175
	ADP metabolic process	20	9	1.62	5.56	+	0.000181	0.00656
	ATP generation from ADP	18	9	1.46	6.18	+	9.69e-05	0.00417
	acetyl-CoA metabolic process	13	7	1.05	6.65	+	0.00042	0.0122
	acyl-CoA metabolic process	20	9	1.62	5.56	+	0.000181	0.00661
	thioester biosynthetic process	10	7	0.81	8.65	+	0.000129	0.00513
	acetyl-CoA biosynthetic process	8	6	0.65	9.26	+	0.000308	0.00974
	acyl-CoA biosynthetic process	10	7	0.81	8.65	+	0.000129	0.00513
	organic hydroxy compound metabolic process	111	23	8.99	2.56	+	0.000168	0.00632
	secondary alcohol metabolic process							ns
	alcohol metabolic process	78	16	6.31	2.53	+	0.00218	0.0455
	organic hydroxy compound biosynthetic process	61	19	4.94	3.85	+	4.88e-06	0.00034
	cellular alcohol biosynthetic process	24	8	1.94	4.12	+	0.00199	0.0425
	alcohol biosynthetic process	42	13	3.4	3.82	+	0.00016	0.00607
	secondary alcohol biosynthetic process							ns
	lipid metabolic process	318	43	25.75	1.67	+	0.00216	0.0454
	lipid biosynthetic process	175	31	14.17	2.19	+	0.000229	0.00787
	fatty acid biosynthetic process	27	10	2.19	4.57	+	0.000284	0.0091
	sterol metabolic process	39	11	3.16	3.48	+	0.000969	0.0245
	steroid metabolic process	42	11	3.4	3.24	+	0.00161	0.0359
	phytosteroid biosynthetic process	24	8	1.94	4.12	+	0.00199	0.0431
	sterol biosynthetic process	33	10	2.67	3.74	+	0.00104	0.0259
	steroid biosynthetic process	33	10	2.67	3.74	+	0.00104	0.0257
	ergosterol biosynthetic process	24	8	1.94	4.12	+	0.00199	0.0427
	vitamin metabolic process	29	9	2.35	3.83	+	0.0016	0.0358
	water-soluble vitamin metabolic process	29	9	2.35	3.83	+	0.0016	0.036
	vitamin biosynthetic process	25	9	2.02	4.45	+	0.000674	0.0179
	water-soluble vitamin biosynthetic process	25	9	2.02	4.45	+	0.000674	0.0178
	pigment metabolic process							ns
	pigment biosynthetic process							ns
	antibiotic metabolic process							ns
	drug metabolic process							ns
	antibiotic biosynthetic process							ns
	transition metal ion homeostasis							ns
	cellular transition metal ion homeostasis							ns
	reactive nitrogen species metabolic process							ns
